# Supplementary material for: Phenotypic Drift in Lupus-Prone MRL/lpr Mice: Potential Roles of MicroRNAs and Gut Microbiota
Source: PubMed Central journal article supplement — Immunohorizons. Author manuscript; Available in PMC 2024 Apr 1. (PMC10984647; doi:10.4049/immunohorizons.2100082), 2022-01-17
Supplement: NIHMS1977637-supplement-Figure_S1_and_Figure_S2.pdf [file NIHMS1977637-supplement-Figure_S1_and_Figure_S2.pdf]

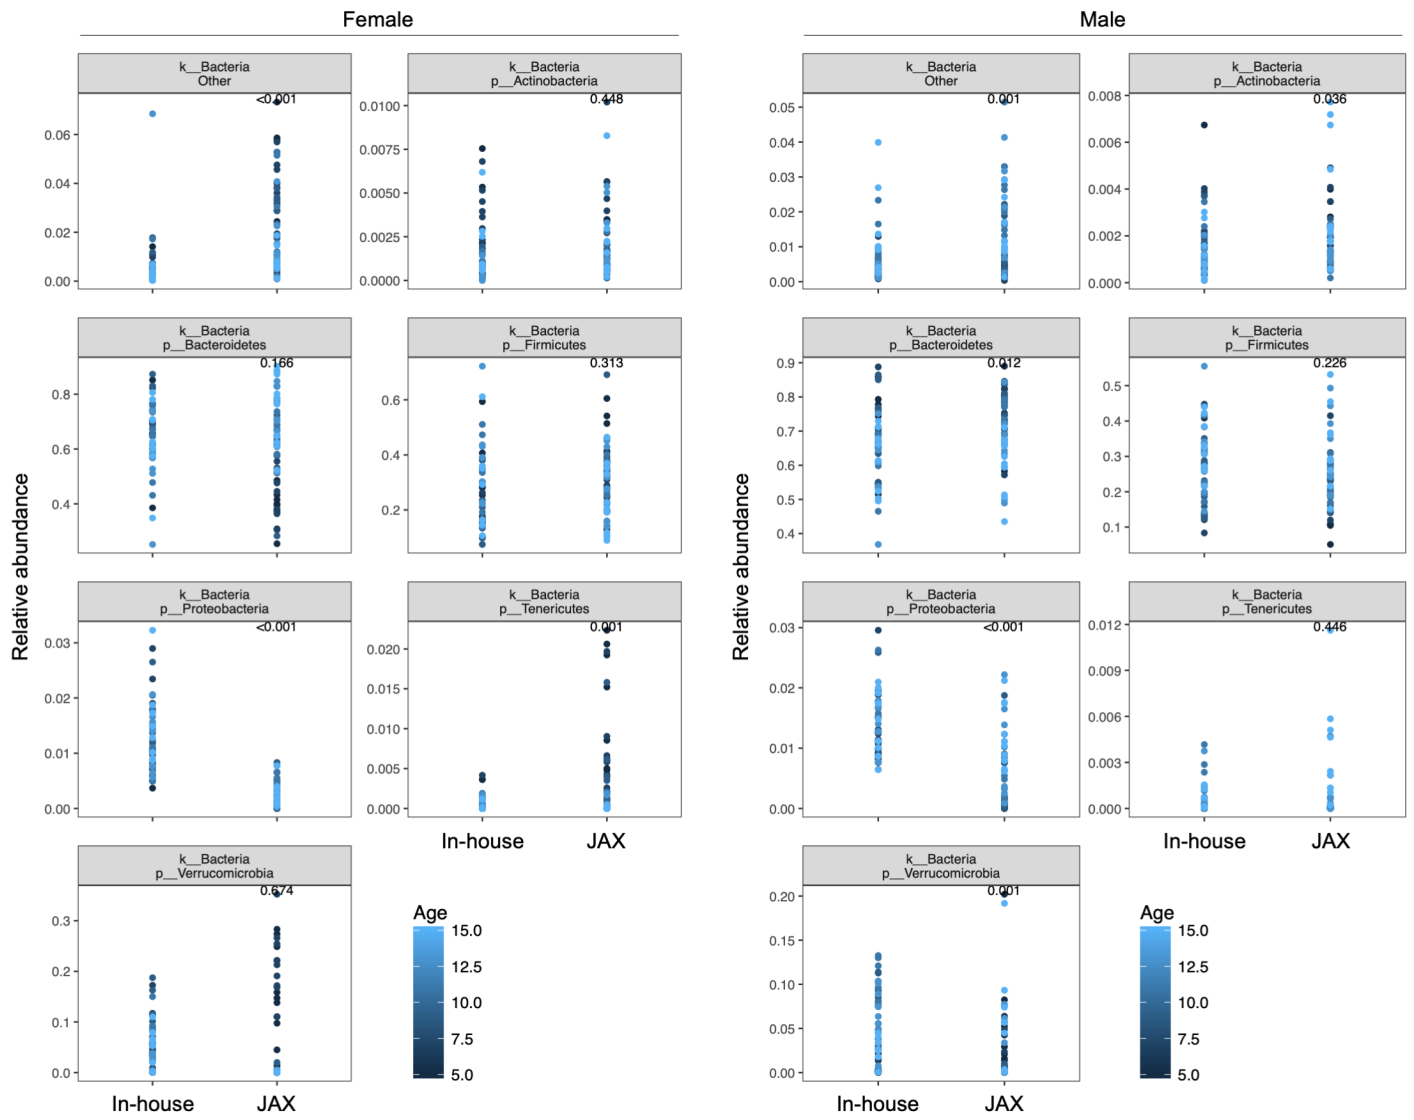

**Figure S1.** Differences in relative abundance at the Phylum level. Different shades of blue color represent different ages, and *p*-values are shown as numbers on the graphs.

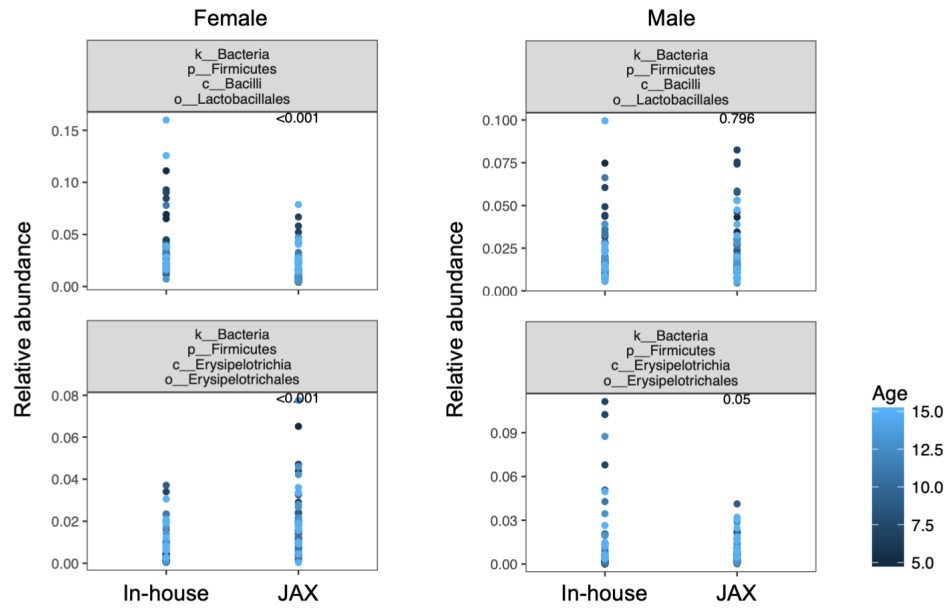

**Figure S2.** Differences in relative abundance for the Orders Lactobacillales and Erysipelotrichales. Different shades of blue color represent different ages, and  $p$ -values are shown as numbers on the graphs.
